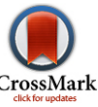

## Correction

# Correction: A Biophysical Basis for Mucus Solids Concentration as a Candidate Biomarker for Airways Disease

The *PLOS ONE* Staff

There were errors in the Funding section. The correct funding statement is as follows: This research was funded by National Science Foundation grants DMS-1100281, DMR-1122483, National Institutes of Health grants NIH/NHLBI 1 P01 HL 108808-01A1, NIH/NHLBI 5 R01 HL 077546-05, P01-HL-118073, a Simons Foundation Collaboration Grant Number 245653, and the Cystic Fibrosis Foundation (HILL08I0, BUTTON07XX0). The funders had no role in study design, data collection and analysis, decision to publish, or preparation of the manuscript.

## Reference

1. Hill DB, Vasquez PA, Mellnik J, McKinley SA, Vose A, et al. (2014) A Biophysical Basis for Mucus Solids Concentration as a Candidate Biomarker for Airways Disease. *PLoS ONE* 9(2): e87681. doi:10.1371/journal.pone.0087681

**Citation:** The *PLOS ONE* Staff (2014) Correction: A Biophysical Basis for Mucus Solids Concentration as a Candidate Biomarker for Airways Disease. *PLoS ONE* 9(5): e97980. doi:10.1371/journal.pone.0097980

**Published:** May 15, 2014

**Copyright:** © 2014 The *PLOS ONE* Staff. This is an open-access article distributed under the terms of the Creative Commons Attribution License, which permits unrestricted use, distribution, and reproduction in any medium, provided the original author and source are credited.
